## RESEARCH ARTICLE

# Intraspecific scaling of the minimum metabolic cost of transport in leghorn chickens (*Gallus gallus domesticus*): links with limb kinematics, morphometrics and posture

Kayleigh A. Rose, Robert L. Nudds and Jonathan R. Codd\*

## ABSTRACT

The minimum metabolic cost of transport ( $\text{CoT}_{\min}$ ;  $\text{J kg}^{-1} \text{m}^{-1}$ ) scales negatively with increasing body mass ( $\propto M_b^{-1/3}$ ) across species from a wide range of taxa associated with marked differences in body plan. At the intraspecific level, or between closely related species, however,  $\text{CoT}_{\min}$  does not always scale with  $M_b$ . Similarity in physiology, dynamics of movement, skeletal geometry and posture between closely related individuals is thought to be responsible for this phenomenon, despite the fact that energetic, kinematic and morphometric data are rarely collected together. We examined the relationship between these integrated components of locomotion in leghorn chickens (*Gallus gallus domesticus*) selectively bred for large and bantam (miniature) varieties. Interspecific allometry predicts a  $\text{CoT}_{\min} \sim 16\%$  greater in bantams compared with the larger variety. However, despite 38% and 23% differences in  $M_b$  and leg length, respectively, the two varieties shared an identical walking  $\text{CoT}_{\min}$ , independent of speed and equal to the allometric prediction derived from interspecific data for the larger variety. Furthermore, the two varieties moved with dynamic similarity and shared geometrically similar appendicular and axial skeletons. Hip height, however, did not scale geometrically and the smaller variety had more erect limbs, contrary to interspecific scaling trends. The lower than predicted  $\text{CoT}_{\min}$  in bantams for their  $M_b$  was associated with both the more erect posture and a lower cost per stride ( $\text{J kg}^{-1} \text{stride}^{-1}$ ). Therefore, our findings are consistent with the notion that a more erect limb is associated with a lower  $\text{CoT}_{\min}$  and with the previous assumption that similarity in skeletal shape, inherently linked to walking dynamics, is associated with similarity in  $\text{CoT}_{\min}$ .

**KEY WORDS:** Terrestrial locomotion, Size, Body mass, Geometric similarity, Energetics

## INTRODUCTION

Body size has a significant influence on the morphology and metabolism of animals (Schmidt-Nielsen, 1975, 1984; Biewener, 1989). In animals that locomote terrestrially, the absolute amount of metabolic energy required to move a given distance increases with increasing body size, but not in direct proportion (slope  $<1$ ) (Bruinzeel et al., 1999; Halsey and White, 2012). In relative terms, the mass-specific energy per unit distance (the cost of transport,

$\text{CoT}$ ;  $\text{J kg}^{-1} \text{m}^{-1}$ ) is lower in larger species than in smaller ones. Often, at optimal self-selected speeds within a gait, animals incur a minimum cost of transport ( $\text{CoT}_{\min}$ ) and it seems reasonable to expect natural selection to favour strategies that minimise the  $\text{CoT}_{\min}$ . For example, if the movement requirements of animals were similar, they would be expected to share optimum limb dynamics, and similar morphological proportions to allow it (Alexander and Jayes, 1983). The evolutionary allometry of  $\text{CoT}_{\min}$  with body mass ( $M_b$ , kg) is widely reported. For example, across more than 90 species of mammals and birds (7 g to 260 kg),  $\text{CoT}_{\min} = 10.7 M_b^{-0.32}$  (Taylor et al., 1982). Adding amphibians, reptiles and invertebrates ( $<1$  g) to this data set yielded a similar result ( $\text{CoT}_{\min} = 10.8 M_b^{-0.32}$ ; Full and Tu, 1991) and African elephants (*Loxodonta africana*,  $M_b = 1542$  kg) fall within the 95% confidence intervals (CIs) of this equation (Langman et al., 1995). The scaling exponent, however, is known to differ between walking and running (Margaria et al., 1963; Minetti et al., 1999; Rubenson et al., 2004, 2007; Maloij et al., 2009; Nudds et al., 2011; Watson et al., 2011), and also between small crouched- and large upright-postured vertebrates (Reilly et al., 2007; Nudds et al., 2009). Furthermore, there is overlooked variation in  $\text{CoT}_{\min}$  at a given  $M_b$ , associated with variation in body form (Full et al., 1990). The general trend of decreasing  $\text{CoT}_{\min}$  with  $M_b$ , however, holds for over three orders of magnitude. Where outliers exist, their relatively more or less economical  $\text{CoT}_{\min}$  compared with other species of the same  $M_b$  is attributed to adaptations associated with activity patterns (Watson et al., 2011), dominant locomotor mode (Dawson and Taylor, 1973; Fish et al., 2000, 2001; Griffin and Kram, 2000; Nudds et al., 2010), ecological niche (Bruinzeel et al., 1999), climate (Yousef et al., 1989; Maloij et al., 2009) or having a protective shell (Baudinette et al., 2000; Zani and Kram, 2008). Ultimately, the reasons underlying the allometry of  $\text{CoT}_{\min}$  with  $M_b$  and the factors that determine the  $\text{CoT}$  are not yet fully understood (Cavagna et al., 1977; Fedak et al., 1982; Heglund et al., 1982a,b; Heglund and Taylor, 1988; Kram and Taylor, 1990; Roberts et al., 1998; Pontzer, 2005, 2007a,b).

Between disparate species, musculoskeletal morphology and shape vary with size (Schmidt-Nielsen, 1975, 1984; Biewener, 1989; Reilly et al., 2007), speed requirements (Garland, 1983), climate (Janis and Wilhelm, 1993), ecological niche (Bruinzeel et al., 1999) and locomotor mode (Griffin and Kram, 2000; Abourachid, 2001; Nudds et al., 2010). Within species or between closely related species, however, variation in shape is reduced, meaning insight can be gained into the factors that dictate the  $\text{CoT}$  and how it scales with  $M_b$  independent of shape (Griffin et al., 2004; Day and Jayne, 2007; Langman et al., 2012). For example, miniature, Arabian and draft horses (*Equus ferus caballus*) showed no difference in  $\text{CoT}_{\min}$  when trotting, despite spanning 8- and 2-fold differences in  $M_b$  and leg length, respectively (Griffin et al., 2004). Similarly, there was little

Faculty of Life Sciences, University of Manchester, Manchester M13 9PT, UK.

\*Author for correspondence (jonathan.codd@manchester.ac.uk)

This is an Open Access article distributed under the terms of the Creative Commons Attribution License (<http://creativecommons.org/licenses/by/3.0>), which permits unrestricted use, distribution and reproduction in any medium provided that the original work is properly attributed.

Received 18 July 2014; Accepted 26 January 2015

**List of symbols and abbreviations**

|                  |                                   |
|------------------|-----------------------------------|
| $CoT_{min}$      | minimum cost of transport         |
| $CoT_{net}$      | net cost of transport             |
| $CoT_{tot}$      | total cost of transport           |
| $f_{stride}$     | stride frequency                  |
| $h_{hip}$        | hip height                        |
| $l_{skel}$       | skeletal leg length               |
| $l_{stride}$     | stride length                     |
| $M_b$            | body mass                         |
| $net-P_{met}$    | net metabolic power               |
| $P_{met}$        | metabolic power                   |
| RMR              | resting metabolic rate            |
| $t_{stance}$     | stance duration                   |
| $t_{swing}$      | swing duration                    |
| $U$              | speed                             |
| $\dot{V}_{CO_2}$ | rate of carbon dioxide production |
| $\dot{V}_{O_2}$  | rate of oxygen consumption        |

difference in walking  $CoT_{min}$  within camels (*Camelus dromedaries*,  $M_b=240\text{--}580$  kg) (Yousef et al., 1989; Maloij et al., 2009) or donkeys (*Equus asinus*,  $M_b=170\text{--}583$  kg) (Yousef et al., 1972; Maloij et al., 2009), or between adult Asian elephants (*Elephas maximus*) and sub-adult African elephants ( $M_b=1435\text{--}3545$  kg) (Langman et al., 1995, 2012). It is assumed that similarity in  $CoT_{min}$  across individuals of differing body masses is due to their being geometrically, posturally and physiologically similar and locomoting with dynamically similar gaits (Griffin et al., 2004; Langman et al., 2012). Surprisingly, despite this explanation being widespread in the literature, there is no empirical evidence linking  $CoT_{min}$  across a size range with similar limb kinematics and skeletal proportions for a walking gait (the only gait over which dynamic similarity can be investigated; Alexander and Jayes, 1983). In humans, the only bipedal species to have been examined across a size range (children–adults), walking  $CoT_{min}$  scaled in a similar manner to that found across species (i.e.  $\propto M_b^{-1/3}$ ) (Weyand et al., 2010), which is contrary to findings from within quadruped investigations where  $CoT_{min}$  was similar across sizes. To fully understand these results, it is necessary to expand the available data for bipeds and to investigate the relationships between the  $CoT$ ,  $M_b$ , limb kinematics and skeletal proportions.

Domestic leghorn chickens, *Gallus gallus domesticus* (Linnaeus 1758), are selectively bred for large and bantam (miniature) varieties, providing an opportunity to investigate how size influences  $CoT_{min}$  independent of shape in an avian species. Rubenson et al. (2007) derived an interspecific scaling equation of walking  $CoT_{min}$  against  $M_b$  [ $CoT_{min}=17.80(\pm 2.98)M_b^{-0.471(\pm 0.032)}$ ] using minimum measured values of the net cost of transport ( $CoT_{net}$ ; the amount of energy required to move 1 kg over 1 m minus maintenance and postural costs) for a range of birds and mammals (0.29–1542 kg). The aim of this study was to investigate whether large ( $N=5$ ; mean  $\pm$  s.e.m.  $M_b=1.92\pm 0.13$  kg, range=1.62–2.19 kg) and bantam ( $N=9$ ;  $M_b=1.39\pm 0.03$  kg, range=1.29–1.54 kg) leghorns would show a 16% difference in  $CoT_{min}$  as predicted by the Rubenson et al. (2007) equation, and to compare their  $CoT_{min}$  with that of animals of a similar  $M_b$ . Importantly, we simultaneously determined whether the two varieties of leghorn walked in a dynamically similar way and were geometrically and posturally similar to gain insight into the links between these integrated components of terrestrial locomotion.

**RESULTS****Morphological measurements**

Mean linear dimensions measured from large and bantam leghorns are presented in Table 1. The skeletal measurements of the bantams

**Table 1. Hindlimb segment measurements and sternal keel lengths from the birds used in experiments and geometric predictions for appendicular measurements of the bantams**

| Length/<br>width       | Bantam (mm)                   | Large (mm)        | Bantam<br>prediction (mm)* |
|------------------------|-------------------------------|-------------------|----------------------------|
| $l_{keel}$             | 90.00 $\pm$ 1.30 <sup>‡</sup> | 107.40 $\pm$ 5.29 |                            |
| $l_{fem}$              | 71.04 $\pm$ 0.83              | 85.92 $\pm$ 1.74  | <b>70.71–73.64</b>         |
| $l_{tib}$              | 107.21 $\pm$ 1.23             | 129.29 $\pm$ 2.19 | <b>106.77–110.44</b>       |
| $l_{tars}$             | 75.45 $\pm$ 1.19              | 93.15 $\pm$ 2.36  | <b>76.27–80.23</b>         |
| $l_{skel}$             | 253.70 $\pm$ 3.11             | 308.37 $\pm$ 6.06 | <b>253.94–264.12</b>       |
| $w_{fem}$              | 7.78 $\pm$ 0.11               | 8.96 $\pm$ 0.24   | 7.33–7.73                  |
| $w_{tib}$              | 7.18 $\pm$ 0.11               | 8.62 $\pm$ 0.25   | <b>7.03–7.45</b>           |
| $w_{tars}$             | 7.57 $\pm$ 0.15               | 9.27 $\pm$ 0.22   | <b>7.60–7.97</b>           |
| $h_{hip}$ <sup>§</sup> | 200.00 $\pm$ 3                | 229.00 $\pm$ 6    | 187.85–197.54              |

$l_{keel}$ , keel length;  $l_{fem}$ , femur length;  $l_{tib}$ , tibiotarsus length;  $l_{tars}$ , tarsometatarsus length;  $l_{skel}$ , skeletal leg length;  $w_{fem}$ , femur width;  $w_{tib}$ , tibiotarsus width;  $w_{tars}$ , tarsometatarsus width;  $h_{hip}$ , hip height.

\*Predicted value ranges for the bantams were calculated as (large linear dimension  $\pm$  s.e.m.)  $\times 0.84$  based on the percentage difference in keel length between the varieties. Bold values represent geometric predictions that were not significantly different from observed bantam measurements.

<sup>‡</sup> $N=6$  for bantam sternum measurements.

<sup>§</sup> $h_{hip}$  measurements are given to the nearest millimetre because the measurements were made in metres to the nearest millimetre.

were, on average,  $\sim 83\%$  of those of the larger variety. Predicted hindlimb dimensions (Table 1) for the bantams, based on the percentage difference in sternum length between the two varieties, all fell within the range predicted from the large variety data (mean  $\pm$  s.e.m.), indicating that the axial and appendicular skeletons of the two varieties were geometrically similar. Independent samples  $t$ -tests (equal variances assumed unless otherwise stated) showed that, represented as a proportion of total skeletal leg length ( $l_{skel}=\text{femur}+\text{tibiotarsus}+\text{tarsometatarsus}$  lengths), the femur (0.28 in both varieties) was not significantly different (equal variances not assumed: Levene's test,  $F=13.71$ ,  $P=0.003$ ) between varieties ( $t=1.00$ , d.f.=4,  $P=0.374$ ). Similarly, the tibiotarsus ( $t=0.07$ , d.f.=12,  $P=0.948$ ) and tarsometatarsus lengths ( $t=-1.26$ , d.f.=12,  $P=0.233$ ) were the same proportion of total leg length in the two varieties (0.42 and 0.30, respectively). Femur width, as a proportion of femur length was also similar ( $t=1.63$ , d.f.=12,  $P=0.128$ ) between the two varieties (0.11 and 0.10 in bantam and large leghorns, respectively). Similarly, the tibiotarsus width:length ratio (0.07 in both varieties) did not differ (equal variances not assumed: Levene's test,  $F=5.25$ ,  $P=0.041$ ) between varieties ( $t=1.07$ , d.f.=5.70,  $P=0.326$ ) and nor did the tarsometatarsus width/length ratio, which was 0.10 in both ( $t=0.00$ ; d.f.=12,  $P=1.00$ ). The two varieties therefore shared similar hindlimb skeletal proportions.

The ratio of hip height to skeletal leg length,  $h_{hip}:l_{skel}$ , a measure of posture (Gatesy and Biewener, 1991), was on average  $\sim 5\%$  greater in the bantam compared with the large variety (0.79 $\pm$ 0.02 and 0.74 $\pm$ 0.01, respectively), but was not statistically different between varieties ( $t=1.96$ , d.f.=12,  $P=0.074$ ). The predicted  $h_{hip}$  for the bantams (Table 1), however, fell outside of the range predicted from the large variety's  $h_{hip}$  data, being approximately 1 cm shorter than measured. Bantam  $h_{hip}$  was 0.87 times that of the larger birds, which was a greater fraction than found for the skeletal element measurements. Therefore, the bantams adopted a more erect posture compared with the large variety.

**Walking kinematics**

Duty factor decreased linearly with speed ( $U$ ,  $m\ s^{-1}$ ) and neither the slope nor the intercept of this relationship differed between varieties (Fig. 1A, Table 2). Stride frequency ( $f_{stride}$ , Hz) increased at the

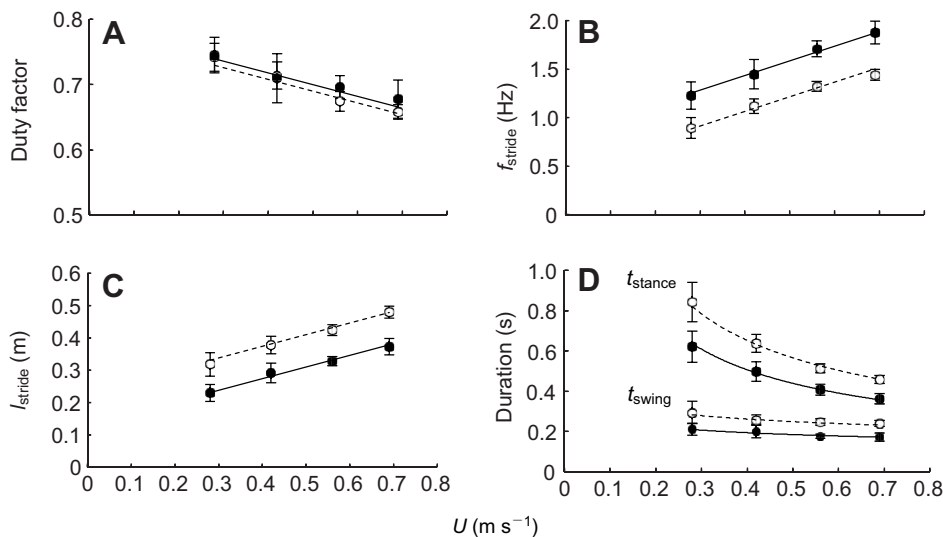

**Fig. 1. Relationships between kinematics parameters and walking speed  $U$ .** Filled circles and solid lines represent data for bantam leghorns and open circles and dashed lines represent data for large leghorns. The lines of best fit are (A) duty factor =  $-0.18U + 0.79$  (bantam) and  $-0.18U + 0.78$  (large); (B) stride frequency,  $f_{\text{stride}} = 1.51U + 0.83$  (bantam) and  $1.51U + 0.46$  (large); (C) stride length,  $l_{\text{stride}} = 0.36U + 0.13$  (bantam) and  $0.36U + 0.23$  (large); and (D) swing time,  $t_{\text{swing}} = 0.16U^{-0.22}$  (bantam) and  $0.21U^{-0.22}$  (large); and stance time,  $t_{\text{stance}} = 0.28U^{-0.64}$  (bantam) and  $0.36U^{-0.64}$  (large). Data points are means  $\pm$  s.d. (s.e. are not large enough to be seen).

same rate with  $U$  in the two varieties, but was 0.37 Hz greater in the bantam variety across all  $U$  (Fig. 1B, Table 2). Similarly, the incremental increase in stride length ( $l_{\text{stride}}$ , m) with  $U$  was the same in the two size groups, whilst  $l_{\text{stride}}$  was longer by 0.09 m across all  $U$  in the large variety (Fig. 1C, Table 2). The duration of the swing phase of the limb ( $t_{\text{swing}}$ , s) decreased curvilinearly with  $U$  at the same rate in the two groups, but was 0.05 s longer in the large variety across all  $U$  (Fig. 1D, Table 2). Stance phase duration ( $t_{\text{stance}}$ , s) also decreased curvilinearly with  $U$  and at the same rate in the two size groups.  $t_{\text{stance}}$  was, however, 0.08 s longer in the large variety across all  $U$  (Fig. 1D, Table 2). Therefore, each parameter responded to increasing  $U$  the same way in the two varieties and differences in their absolute values (related to size) were fixed across all speeds.

### Metabolic power and CoT

The positive relationship between mass-specific metabolic power ( $P_{\text{met}}$ ,  $\text{W kg}^{-1}$ ) and walking  $U$  (Fig. 2A) was similar (both the slopes and intercepts) for the two varieties (Table 2). Calculating  $\text{CoT}_{\text{min}}$  as the slope of this relationship (slope method) therefore gives  $16.20 \text{ J kg}^{-1} \text{ m}^{-1}$  in each variety. During quiet standing, resting metabolic rate (RMR,  $\text{W kg}^{-1}$ ) did not differ (Fig. 2A, Table 2) between bantam and large leghorns ( $7.24 \pm 0.42$  and  $7.21 \pm 0.48 \text{ W kg}^{-1}$ , respectively), indicating that they shared the same mass-specific energetic cost of general maintenance and maintaining their posture combined. Therefore, the relationship between net mass-specific metabolic power ( $\text{net-}P_{\text{met}}$ ,  $\text{W kg}^{-1}$ : the metabolic rate required for locomotion exceeding that required for standing quietly) and  $U$  (Fig. 2A) was also similar for the two size groups (Table 2).

Total cost of transport ( $\text{CoT}_{\text{tot}}$ ,  $\text{J kg}^{-1} \text{ m}^{-1}$ ) decreased curvilinearly with  $U$ , indicating that the highest walking speeds of the birds were most metabolically optimal.  $\text{CoT}_{\text{net}}$  ( $\text{J kg}^{-1} \text{ m}^{-1}$ ;  $\text{net-}P_{\text{met}}/U$ ), however, was not correlated with  $U$  and fell within a similar range for the two size groups (bantam:  $9.44\text{--}16.10 \text{ J kg}^{-1} \text{ m}^{-1}$ ; large:  $9.72\text{--}15.33 \text{ J kg}^{-1} \text{ m}^{-1}$ ) (Fig. 2B, Table 2). Calculating  $\text{CoT}_{\text{min}}$  as the minimum measured  $\text{CoT}_{\text{net}}$  (subtraction method), taken as the mean of all  $\text{CoT}_{\text{net}}$  values across all speeds and both varieties, gives  $13.04 \text{ J kg}^{-1} \text{ m}^{-1}$ . Predicted walking  $\text{CoT}_{\text{min}}$  values for large and bantam leghorns based on Rubenson et al. (2007) were  $13.09$  and  $15.24 \text{ J kg}^{-1} \text{ m}^{-1}$ , respectively. Both varieties therefore shared a  $\text{CoT}_{\text{min}}$  closer to that predicted for the larger variety, contrary to the 16% difference predicted. This corresponds to the bantams having a

$\text{CoT}_{\text{min}} \sim 14\%$  lower than predicted for their  $M_b$ , which fell within the 95% CIs of Rubenson et al.'s (2007) equation. The net cost per stride ( $\text{J kg}^{-1} \text{ stride}^{-1}$ ) was lower in bantams than in the larger variety by  $1.17 \text{ J kg}^{-1} \text{ stride}^{-1}$  across all speeds (Fig. 2C, Table 2).

### DISCUSSION

Across species,  $\text{CoT}_{\text{min}}$  is reported to scale hypoallometrically with  $M_b$  (Taylor et al., 1970, 1982; Fedak et al., 1974; Kram and Taylor, 1990; Full and Tu, 1991; Langman et al., 1995; Roberts et al., 1998). However, we found that bantam and large varieties of leghorn chickens have identical  $\text{CoT}_{\text{min}}$  despite the smallest and largest individuals differing 1.7-fold in  $M_b$  and 1.35-fold in leg length. An independence of  $\text{CoT}_{\text{min}}$  from body size was previously reported within large quadrupedal species ( $>90 \text{ kg}$ ) spanning 1.5- to 8-fold ranges in  $M_b$  and up to 2-fold ranges in leg length (Griffin et al., 2004; Maloiy et al., 2009; Langman et al., 2012). The present data represent the first evidence of a lack of correlation between  $M_b$  and  $\text{CoT}_{\text{min}}$  within an avian species. No effect of  $M_b$  or leg length suggests that size itself does not influence the  $\text{CoT}$  but, rather, some other factor, perhaps correlated with body size, may be responsible.

The simultaneous collection of kinematics and morphological data here allow us to investigate further previous hypotheses on what is driving the interspecific  $\text{CoT}_{\text{min}}$  versus  $M_b$  relationship. Larger species perform the same amount of mass-specific mechanical work as smaller species, whilst using less mass-specific metabolic energy during terrestrial locomotion (Fedak et al., 1982; Heglund et al., 1982a,b; Alexander, 2005). How this is possible is not fully understood. It is generally accepted that  $M_b$  has no independent influence over  $\text{CoT}$  (Pontzer, 2005, 2007a,b). Leg length, however, is often discussed as the morphological factor explaining the allometry of  $\text{CoT}_{\text{min}}$  (Kram and Taylor, 1990; Schmidt, 1984; Biewener, 2003; Alexander, 2003) as longer legs allow longer  $t_{\text{stance}}$  for the muscles to apply force through recruiting slower, less metabolically expensive muscle fibres (metabolic rate is inversely proportional to  $t_{\text{stance}}$  during which the muscles apply force) (Kram and Taylor, 1990). In addition, longer limbs allow lower  $f_{\text{stride}}$ , requiring fewer muscle contractions. In the present study, however, the different sized birds shared the same mass-specific  $\text{CoT}_{\text{min}}$ , despite the bantams having shorter limbs, shorter  $t_{\text{stance}}$  and higher  $f_{\text{stride}}$  compared with the larger variety. Using the maximum height of the limb as a strut (effective limb length,  $h_{\text{hip}}$ ) as the indicator of size

**Table 2. Results of GLMs that tested for differences in metabolic and kinematic measurements between chicken varieties**

| Parameter                                                                | Covariate/<br>factor<br>interaction <sup>‡</sup> | GLM1<br>d.f. <sup>§</sup> | <i>F</i> | <i>P</i> | GLM2<br>d.f. <sup>§</sup> | <i>F</i> | <i>P</i> | $\eta_p^2$ | Observed<br>power | $r^{2\parallel}$ |
|--------------------------------------------------------------------------|--------------------------------------------------|---------------------------|----------|----------|---------------------------|----------|----------|------------|-------------------|------------------|
| Duty factor                                                              | <i>U</i>                                         | 1,47                      | 61.90    | <0.001   | 1,48                      | 59.43    | <0.001   | 0.56       | 1.00              | 0.54             |
|                                                                          | Variety                                          | 1,47                      | 0.70     | 0.406    | 1,48                      | 1.80     | 0.186    | 0.04       | 0.30              |                  |
|                                                                          | Variety× <i>U</i>                                | 1,47                      | 0.17     | 0.199    | *                         | *        | *        | *          | *                 |                  |
| $f_{\text{stride}}$ (Hz)                                                 | <i>U</i>                                         | 1,47                      | 217.96   | <0.001   | 1,48                      | 231.94   | <0.001   | 0.84       | 1.00              | 0.88             |
|                                                                          | Variety                                          | 1,47                      | 5.52     | 0.023    | 1,48                      | 144.11   | <0.001   | 0.77       | 1.00              |                  |
|                                                                          | Variety× <i>U</i>                                | 1,47                      | 1.80     | 0.186    | *                         | *        | *        | *          | *                 |                  |
| $l_{\text{stride}}$ (m)                                                  | <i>U</i>                                         | 1,47                      | 242.10   | <0.001   | 1,48                      | 244.37   | <0.001   | 0.85       | 1.00              | 0.89             |
|                                                                          | Variety                                          | 1,47                      | 8.42     | 0.006    | 1,48                      | 172.30   | <0.001   | 0.80       | 1.00              |                  |
|                                                                          | Variety× <i>U</i>                                | 1,47                      | 1.20     | 0.228    | *                         | *        | *        | *          | *                 |                  |
| $\log_{10} t_{\text{swing}}$ (s)                                         | $\log_{10}U$                                     | 1,47                      | 17.14    | <0.001   | 1,48                      | 18.57    | <0.001   | 0.29       | 0.99              | 0.65             |
|                                                                          | variety                                          | 1,47                      | 13.22    | 0.001    | 1,48                      | 78.62    | <0.001   | 0.66       | 1.00              |                  |
|                                                                          | Variety× $\log_{10}U$                            | 1,47                      | 0.02     | 0.877    | *                         | *        | *        | *          | *                 |                  |
| $\log_{10} t_{\text{stance}}$ (s)                                        | $\log_{10}U$                                     | 1,47                      | 339.11   | <0.001   | 1,48                      | 341.40   | <0.001   | 0.88       | 1.00              | 0.90             |
|                                                                          | Variety                                          | 1,47                      | 10.38    | 0.002    | 1,48                      | 117.64   | <0.001   | 0.72       | 1.00              |                  |
|                                                                          | Variety× $\log_{10}U$                            | 1,47                      | 1.48     | 0.230    | *                         | *        | *        | *          | *                 |                  |
| RMR ( $W\text{ kg}^{-1}$ )                                               | Variety                                          | 1,12                      | 1.64     | 0.22     | *                         | *        | *        | *          | *                 | 0.05             |
| $P_{\text{met}}$ ( $W\text{ kg}^{-1}$ )                                  | <i>U</i>                                         | 1,50                      | 52.61    | <0.001   | 1,51                      | 53.35    | <0.001   | 0.51       | 1.00              | 0.50             |
|                                                                          | Variety                                          | 1,50                      | 1.59     | 0.214    | 1,51                      | 2.31     | 0.135    | 0.04       | 0.32              |                  |
|                                                                          | Variety× <i>U</i>                                | 1,50                      | 0.71     | 0.404    | *                         | *        | *        | *          | *                 |                  |
| Net- $P_{\text{met}}$ ( $W\text{ kg}^{-1}$ )                             | <i>U</i>                                         | 1,50                      | 52.94    | <0.001   | 1,51                      | 53.23    | <0.001   | 0.51       | 1.00              | 0.49             |
|                                                                          | Variety                                          | 1,50                      | 1.08     | 0.303    | 1,51                      | 0.29     | 0.591    | 0.00       | 0.08              |                  |
|                                                                          | Variety× <i>U</i>                                | 1,50                      | 0.85     | 0.362    | *                         | *        | *        | *          | *                 |                  |
| $\log_{10} \text{CoT}_{\text{tot}}$ ( $J\text{ kg}^{-1}\text{ m}^{-1}$ ) | $\log_{10}U$                                     | 1,50                      | 28.34    | <0.001   | 1,51                      | 33.43    | <0.001   | 0.53       | 1.00              | 0.71             |
|                                                                          | Variety                                          | 1,50                      | 0.01     | 0.912    | 1,51                      | 3.79     | 0.057    | 0.05       | 0.35              |                  |
|                                                                          | Variety× $\log_{10}U$                            | 1,50                      | 0.93     | 0.338    | *                         | *        | *        | *          | *                 |                  |
| $\text{CoT}_{\text{net}}$ ( $J\text{ kg}^{-1}\text{ m}^{-1}$ )           | <i>U</i>                                         | 1,50                      | 1.82     | 0.184    | 1,51                      | 1.08     | 0.304    | 0.02       | 0.18              | 0.00             |
|                                                                          | Variety                                          | 1,50                      | 2.35     | 0.132    | 1,51                      | 0.87     | 0.355    | 0.02       | 0.16              |                  |
|                                                                          | Variety× <i>U</i>                                | 1,50                      | 1.71     | 0.196    | *                         | *        | *        | *          | *                 |                  |
| Net cost per stride<br>( $J\text{ kg}^{-1}\text{ stride}^{-1}$ )         | <i>U</i>                                         | 1,45                      | 14.62    | <0.001   | 1,46                      | 12.96    | 0.001    | 0.22       | 0.94              | 0.261            |
|                                                                          | Variety                                          | 1,45                      | 0.297    | 0.588    | 1,46                      | 4.91     | 0.032    | 0.10       | 0.58              |                  |
|                                                                          | Variety× <i>U</i>                                | 1,45                      | 1.578    | 0.215    | *                         | *        | *        | *          | *                 |                  |

$f_{\text{stride}}$ , stride frequency;  $l_{\text{stride}}$ , stride length;  $t_{\text{swing}}$ , swing duration;  $t_{\text{stance}}$ , stance duration; RMR, resting metabolic rate;  $P_{\text{met}}$ , metabolic power; net- $P_{\text{met}}$ , net metabolic power;  $\text{CoT}_{\text{tot}}$ , total cost of transport;  $\text{CoT}_{\text{net}}$ , net cost of transport.

<sup>‡</sup>Speed (*U*,  $\text{m s}^{-1}$ ) is a covariate, chicken variety is a fixed factor and variety×*U* is the interaction term in the models.

<sup>§</sup>d.f. are represented as (d.f., error d.f.).

<sup>¶</sup>The adjusted  $r^2$  values are reported for second GLM analyses.

Variables that did not have a significant effect on parameters were not included in second GLM analyses and are represented by an asterisk.

has been shown to better predict  $\text{CoT}_{\text{min}}$  across species ( $h_{\text{hip}}$ ,  $r^2=0.98$ ) than using the sum of the skeletal element lengths ( $l_{\text{skel}}$ ,  $r^2=0.78$ ) (Stuedel and Beattie, 1995; Pontzer, 2007a). Over a small size scale of analysis, however, it has been demonstrated that between-individual differences in limb arrangement (e.g. limb excursion angle), the cost of swinging the limb and the coefficient of converting metabolic energy into muscle force ‘*k*’ (which were not measured in this study) prevent a clear relationship between  $h_{\text{hip}}$  and  $\text{CoT}_{\text{min}}$  (Pontzer, 2005, 2007b). In agreement with Pontzer’s (2005, 2007b) findings, despite the greater absolute  $h_{\text{hip}}$  of the larger variety, compared with the bantams, they did not have a lower  $\text{CoT}_{\text{min}}$ . It may be that variation in limb excursion angle (i.e. the difference in posture), rather than  $h_{\text{hip}}$ , dominated variation in  $\text{CoT}_{\text{min}}$ . Indeed, by using a model to predict the rate of force production associated with both supporting body weight and swinging the limb as a function of all of these parameters, Pontzer (2007a) found this was a better predictor of metabolic rate than contact time, limb length or  $M_b$  at both interspecific and intraspecific levels. Equally, the shared  $\text{CoT}_{\text{min}}$  of the two varieties may be due to their identical appendicular and axial skeletal geometry, consistent with previous assumptions in intraspecific analyses (Langman et al., 2012).

Another potential explanatory factor is limb posture (linked to effective limb length). Across vertebrates, the limb bone lengths

scale positively and almost geometrically with  $M_b$ , but become increasingly more aligned with one another and less crouched (Biewener, 1989). A prominent step-change exists in the scaling of both  $\text{CoT}_{\text{min}}$  and the mechanical cost of transport ( $E_{\text{mech}}$ ;  $J\text{ kg}^{-1}\text{ m}^{-1}$ ) across species associated with crouched postures in those <1 kg and upright postures in those >1 kg, making their efficiency of transport ( $\text{CoT}_{\text{min}}/E_{\text{mech}}$ ) approximately 7% and 26%, respectively (Reilly et al., 2007; Nudds et al., 2009). Unlike larger species with a more upright posture, small crouched-postured (non-cursorial) species do not benefit from elastic energy savings or pendular mechanisms (Reilly et al., 2007). Furthermore, a more vertical limb decreases the muscular force required to support a unit of body weight and improves the mechanical advantage of the muscles (Biewener, 1989). The change in posture with increasing size means that muscle stress is nearly independent of  $M_b$  across species (rather than  $\propto M_b^{1/3}$ ). Griffin et al. (2004) suggested that between closely related individuals, consistent limb posture might account for consistent  $\text{CoT}_{\text{min}}$  across a range of body sizes as muscle stress would in this case scale geometrically ( $\propto M_b^{1/3}$ ). The volume of active muscle would therefore increase with size and counter any metabolic savings associated with having longer legs (Griffin et al., 2004). However, in the present study the shared  $\text{CoT}_{\text{min}}$  of the chicken groups did not correspond to a similar posture. When comparing the posture of the two size groups as  $h_{\text{hip}}:l_{\text{skel}}$ , the limbs

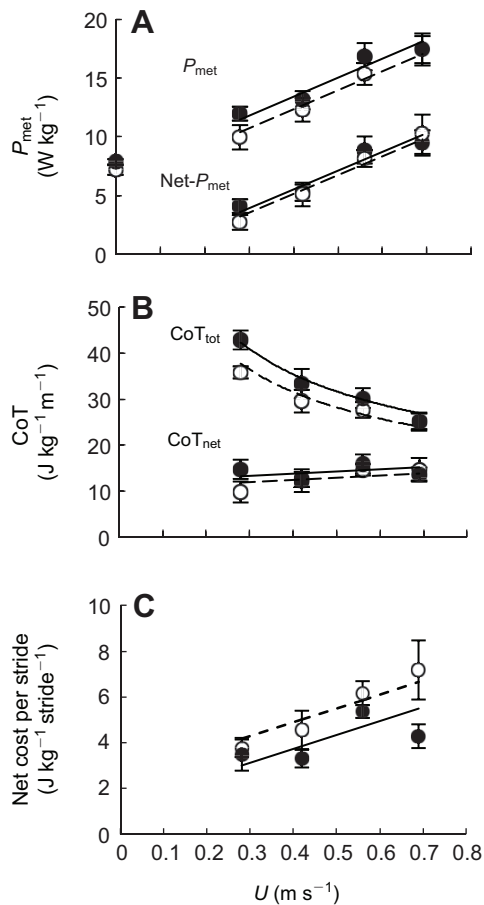

**Fig. 2. Relationships between mass-specific energetic parameters and walking speed.** Data points and best-fit lines are as in Fig. 1. The lines of best fit are (A) metabolic power,  $P_{\text{met}}=16.20U+6.93$  (bantam) and  $16.20U+5.86$  (large); and net metabolic power,  $\text{net-}P_{\text{met}}=16.00U-0.88$  (bantam) and  $16.00U-1.26$  (large); (B) total cost of transport,  $\text{CoT}_{\text{tot}}=22.39U^{-0.50}$  (bantam) and  $19.95U^{-0.50}$  (large); and net cost of transport,  $\text{CoT}_{\text{net}}=4.77U+11.89$  (bantam) and  $4.77U+10.53$  (large); and (C) net cost per stride= $7.10U+2.42$  (bantam) and  $21.21U+0.24$  (large). Mass-specific resting (standing) metabolic rates are also included in A at  $0 \text{ m s}^{-1}$ . Data points are means  $\pm$  s.e.m.

were 5% more erect in the variety selected for smaller size. The shared  $\text{CoT}_{\text{min}}$  in this case is perhaps better explained by the posture and lower cost per stride of the bantams. Across avian species,  $h_{\text{hip}}$  represents a greater proportion of  $l_{\text{skel}}$  with increasing  $M_b$  (Gatesy and Biewener, 1991). One potential explanation for why we found the opposite to what would be expected, as well as the lower cost per stride in the bantams, may be that the two varieties differ in their derived muscle properties or architecture as a result of selective breeding.

The kinematic data indicate that with  $U$ , the two varieties shared identical rates of change in all parameters, which would be expected to imply geometric, postural and dynamic similarity. Each kinematic parameter differed between the two varieties only by a fixed value across all speeds. The larger variety took longer strides by 9 cm, took less frequent strides by 0.37 Hz and had longer durations of both swing and stance phases of the limb by 0.05 and 0.08 s, respectively. At a given absolute  $U$ , duty factor is generally higher in larger species than in smaller ones (Gatesy and Biewener, 1991); however, the duty factors of the chickens were not significantly different between size groups. Similarly, a selection of felid species spanning a 46-fold range in  $M_b$  were found to use similar duty factors at a similar walking speed (Day and Jayne, 2007). For what was

previously an expectation (Griffin et al., 2004; Maloij et al., 2009; Langman et al., 2012), the present data offer the first empirical evidence of a link between identical walking  $\text{CoT}_{\text{min}}$  in individuals of differing size and similar limb dynamics and skeletal geometry. We can speculate that for a given skeletal shape, regardless of  $M_b$ , walking  $\text{CoT}_{\text{min}}$  may be consistent. Some additional studies in which shape was controlled for also support this idea. For example, adding back loads up to 50% of  $M_b$  has a negligible effect on the  $\text{CoT}$  in quadrupedal rats, dogs and horses as well as bipedal humans, guinea fowl and other birds (Taylor et al., 1980; Ellerby and Marsh, 2006; Tickle et al., 2010, 2013). Furthermore, obese and thin humans of the same height (likely to be similar in skeletal proportions) show no difference in  $\text{CoT}_{\text{min}}$  (Browning et al., 2006).

In contrast to our findings, a comprehensive study of 48 humans spanning a 6-fold range in  $M_b$  and 1.5-fold range in height concluded that  $\text{CoT}_{\text{min}}$  was  $\propto M_b^{-1/3}$  (Weyand et al., 2010). This result, however, may be associated with ontogenetic differences in shape, because the human subjects ranged from 5 to 32 years of age and the data were intentionally separated into four size groups to reduce individual variability (Weyand et al., 2010). Indeed, dividing the  $\text{CoT}$  by body height accounted for the observed differences between the human size groups. Therefore, at any given speed, all subjects incurred the same  $\text{CoT}$  to cover the same horizontal distance relative to their own body height (Weyand et al., 2010). Small (2 g) ghost crabs (*Ocypode quadrata*), one of the few invertebrate species examined, were found to have a higher  $\text{CoT}$  than larger ones (47 g), despite their similar appearance in shape (Tullis and Andrus, 2011). In the absence of detailed kinematic and morphometric measurements, however, it is not possible to conclude much from this result. It is, of course, possible that the link we found here between energetics, kinematics and skeletal morphometrics may not be characteristic of species with more than two legs.

## Conclusions

Leghorn chickens selectively bred for large and bantam varieties shared the same walking  $\text{CoT}_{\text{min}}$  despite a 1.70-fold difference in  $M_b$  and 1.35-fold difference in total leg length between the smallest and largest individuals. These data represent the first evidence of  $\text{CoT}_{\text{min}}$  being independent of  $M_b$  within a small crouched-postured bipedal species. Our findings also provide the first evidence (for what was previously only assumed) of a link between this and similar walking dynamics and skeletal geometry. In contrast to interspecific trends, however,  $h_{\text{hip}}$  did not scale geometrically between varieties and represented a greater proportion of total leg length in the bantam variety compared with the large variety. All birds shared a  $\text{CoT}_{\text{min}}$  closer to that predicted for the larger variety and the  $\text{CoT}_{\text{min}}$  of the bantams was approximately 14% lower than predicted from their  $M_b$ . Our findings are therefore in agreement with the general consensus that for a given body size,  $\text{CoT}_{\text{min}}$  decreases with limb erectness. The lower than predicted  $\text{CoT}_{\text{min}}$  in the bantams was also associated with lower mass-specific energy requirements per stride, compared with the larger variety, which may be linked to differences in their posture and/or their derived muscle morphology/physiology. We emphasise the importance of intraspecific in addition to interspecific investigations as well as the combination of kinematics, morphometric and posture measurements towards gaining insight into the factors that dictate  $\text{CoT}$ .

## MATERIALS AND METHODS

### Study species

Adult (>16 week) male bantam ( $N=9$ ; mean  $\pm$  s.e.m.  $M_b=1.39 \pm 0.03$  kg) and large ( $N=5$ ;  $M_b=1.92 \pm 0.13$  kg) leghorn chickens were purchased from a local

breeder and housed in the University of Manchester's animal unit. All housing was maintained on a 13 h:11 h light:dark cycle, at 18–22°C. Food and water were provided *ad libitum*, and the birds were not fasted prior to experiments. Birds were trained for 1 week to locomote on a motorised treadmill (T60 Tunturi®, Finland) prior to data collection. All experiments were carried out in accordance with the Animals (Scientific Procedures) Act 1986, were approved by the University of Manchester Ethics Committee and performed under a UK Home Office Project Licence held by J.R.C. (40/3549).

### Respirometry

An open flow respirometry system (all equipment Sable Systems International®, Las Vegas, NV, USA) was used to measure the birds' rates of oxygen consumption ( $\dot{V}_{O_2}$ , ml min<sup>-1</sup>) and carbon dioxide production ( $\dot{V}_{CO_2}$ , ml min<sup>-1</sup>). Perspex® respirometry chambers were built (bantam: 66×46.5×48 cm, large: 97.5×53.5×48 cm) and mounted upon the treadmill. Air was pulled through the chambers using a FlowKit 500 at flow rates (FR) of 150 l min<sup>-1</sup> (bantam) and 250 l min<sup>-1</sup> (large). Excurrent airflow was sub-sampled (0.11 l min<sup>-1</sup>) for gas analysis. Water vapour pressure (WVP) was measured using an RH-300 water vapour analyser before the air was scrubbed of H<sub>2</sub>O with calcium chloride (2–6 mm granular, Merck, Darmstadt, Germany) and passed through a CO<sub>2</sub> analyser (CA-10A). The dry air was scrubbed of CO<sub>2</sub> using soda lime (2–5 mm granular, Sigma-Aldrich, Steinheim, Germany) and passed through a dual absolute and differential O<sub>2</sub> analyser (Oxilla II). Ambient air (scrubbed of H<sub>2</sub>O and CO<sub>2</sub> as before) was simultaneously passed through a second O<sub>2</sub> channel on the Oxilla II at 0.11 l min<sup>-1</sup> by a pump (SS-3) to enable calculation of differential O<sub>2</sub> concentration ( $\Delta O_2$ ). CO<sub>2</sub> traces were baseline to calculate differential CO<sub>2</sub> concentration ( $\Delta CO_2$ ). Voltage outputs were recorded using a UI2 interface and analysed using ExpeData® v 1.1.15 software. The accuracy of the respirometry set up ( $\pm 5\%$ ) across all speeds was determined using a N<sub>2</sub> dilution test (Fedak et al., 1981). Primary flow rates (FR) were adjusted to dry-corrected flow rates (FR<sub>c</sub>), to account for the H<sub>2</sub>O scrubbed from air samples prior to gas measurements using:

$$FR_c = \frac{FR \cdot (BP - WVP)}{BP}, \quad (1)$$

where BP is barometric pressure (measured with the Oxilla II) and WVP is water vapour pressure (Lighton, 2008).  $\dot{V}_{O_2}$  was calculated using (Lighton, 2008):

$$\dot{V}_{O_2} = \frac{FR_c(\Delta O_2)}{1 - 0.2095} \quad (2)$$

and  $\dot{V}_{CO_2}$  using (Lighton, 2008):

$$\dot{V}_{CO_2} = \frac{(FR_c(\Delta CO_2)) - (0.0004(\dot{V}_{O_2}))}{1 - 0.0004}. \quad (3)$$

The birds were exercised over a range of randomised speeds (three per day) up to the maximum sustainable (bantam: 0.28–1.11 m s<sup>-1</sup>, large: 0.28–1.39 m s<sup>-1</sup>). Birds were given a rest of a minimum of 5 min to stand quietly between each period of exercise. RMRs were taken from the final rest period of each trial. Data were collected from stable gas readings lasting >1 min. Only data from speeds at which both varieties used a walking gait (0.28, 0.42, 0.56 and 0.69 m s<sup>-1</sup>) were included in analyses.

### Metabolic rate calculations

Five values were calculated at each speed: (1)  $P_{met}$  was converted from  $\dot{V}_{O_2}$ , using respiratory exchange ratios (RERs:  $\dot{V}_{CO_2}:\dot{V}_{O_2}$ ) and thermal equivalents taken from Brody (1945); (2) net- $P_{met}$  was calculated by subtracting RMR from locomotor  $P_{met}$  (both from the same trial); (3) CoT<sub>tot</sub> was calculated as  $P_{met}/U$ ; (4) CoT<sub>net</sub> was calculated as net- $P_{met}/U$ ; and (5) the cost per stride was calculated as net- $P_{met}/f_{stride}$ .

CoT<sub>min</sub> was calculated using two methods: first, as the slope of the linear relationship between  $P_{met}$  and  $U$  (slope method) and, second, as the minimum measured CoT<sub>net</sub> (subtraction method). CoT<sub>min</sub> values calculated using the subtraction method were compared with predictions for walking birds and mammals of a similar  $M_b$  using eqn 3 from Rubenson et al. (2007).

### Gait kinematics

The birds were filmed (100 frames s<sup>-1</sup>) at all speeds in lateral view using a video camera (HDR-XR520VE, Sony, Japan). The left foot of each bird was tracked (~10 strides) at each speed using Tracker software (v. 4.05, Open Source Physics) in order to quantify duty factor,  $f_{stride}$ ,  $l_{stride}$  ( $U/f_{stride}$ ),  $t_{stance}$  and  $t_{swing}$ . Fluctuations in the kinetic and potential energy of the centre of mass (CoM) across a stride were determined through frame-by-frame tracking of a marker positioned over the left hip joint of the birds (indicative of  $h_{hip}$ ). To ensure that the birds were using a walking gait at all speeds analysed, the phase relationship between the horizontal kinetic energy ( $E_{kh}$ ) and the sum of the potential and vertical kinetic energies ( $E_p+E_{kv}$ ) of the CoM ( $h_{hip}$ ) was determined. An out-of-phase relationship, indicating a walking gait, was found for all speeds used in the analyses.

### Morphological measurements

Keel length and the length and width (mid-shaft) of the right femur, tibiotarsus and tarsometatarsus was measured from the birds used in the respirometry experiments using digital vernier calipers (accuracy,  $\pm 0.01$  mm). Geometric similarity in linear dimensions between the two size groups was investigated by determining whether their axial and appendicular dimensions scaled 1:1. The mean appendicular dimensions of the bantams were predicted based on the ratio of their keel length to that of the large variety. Skeletal element lengths were also compared as a percentage of total leg length. The ratio of  $h_{hip}$  to total skeletal leg length ( $l_{skel} = \text{femur} + \text{tibiotarsus} + \text{tarsometatarsus}$  lengths) was calculated and used as a means of comparing posture between the two size groups, with a lower value indicating a more crouched posture. Back height ( $h_{back}$ , m) was measured during the mid-stance as the distance from the hindtoe to the back at 90 deg to the direction of travel. Where birds ( $N=3$ ) did not walk with ease with a hip marker, the ratio  $h_{hip}/h_{back}$  (bantam: 0.80 $\pm$ 0.01, large: 0.77 $\pm$ 0.00) was used to estimate  $h_{hip}$ .

### Statistical analyses

The slopes and the intercepts of the relationships between the dependent variables (metabolic or kinematics measures) and  $U$  were investigated for differences between chicken varieties using general linear models (GLMs). Models included variety as a fixed factor,  $U$  as a covariate and the interaction term variety $\times U$ . If the interaction term was non-significant (indicating similar slopes between varieties), it was removed from the model and the updated model was re-run (assuming parallel lines) in order to test for differences in intercepts. Where the relationship between a dependent variable and  $U$  was curvilinear, the data were log<sub>10</sub> transformed. All best-fit lines were taken from coefficients tables produced by the GLMs. Between-variety differences in hindlimb skeletal element proportions (% total leg length) were investigated using independent samples  $t$ -tests. Hindlimb proportion data were tested for equality of variance using a Levene's test for equality of variance.

### Acknowledgements

We would like to thank John Lees and Karlina Ozolina for their assistance with respirometry data collection.

### Competing interests

The authors declare no competing or financial interests.

### Author contributions

The study was conceived and designed by J.R.C. and R.L.N. K.A.R. executed the study. Data were interpreted and analysed by K.A.R. with assistance from R.L.N. and J.R.C. K.A.R., R.L.N. and J.R.C. drafted and revised the manuscript.

### Funding

This research was supported through funding provided by the Biotechnology and Biological Sciences Research Council (BBSRC: G01138/1 and I0021116/1 to J.R.C.). K.A.R. was supported by a Natural Environment Research Council (NERC) doctoral training account (DTA) PhD stipend and Collaborative Awards in Science and Engineering (CASE) partnership with The Manchester Museum. Deposited in PMC for immediate release.

### References

Abourachid, A. (2001). Kinematic parameters of terrestrial locomotion in cursorial (ratites), swimming (ducks), and striding birds (quail and guinea fowl). *Comp. Biochem. Physiol. A Mol. Integr. Physiol.* **131**, 113–119.

- Alexander, R. M. (2003). *Principles of Animal Locomotion*. Princeton, NJ: Princeton University Press.
- Alexander, R. M. (2005). Models and the scaling of energy costs for locomotion. *J. Exp. Biol.* **208**, 1645-1652.
- Alexander, R. M. and Jayes, A. S. (1983). A dynamic similarity hypothesis for the gaits of quadrupedal mammals. *J. Zool.* **201**, 135-152.
- Baudinette, R. V., Miller, A. M. and Sarre, M. P. (2000). Aquatic and terrestrial locomotory energetics in a toad and a turtle: a search for generalisations among ectotherms. *Physiol. Biochem. Zool.* **73**, 672-682.
- Biewener, A. A. (1989). Scaling body support in mammals: limb posture and muscle mechanics. *Science* **245**, 45-48.
- Biewener, A. A. (2003). *Animal Locomotion*, pp. 214-219. Oxford: Oxford University Press.
- Brody, S. (1945). *Bioenergetics and Growth, With Special Reference to The Efficiency Complex In Domestic Animals*. New York: Reinhold.
- Browning, R. C., Baker, E. A., Herron, J. A. and Kram, R. (2006). Effects of obesity and sex on the energetic cost and preferred speed of walking. *J. Appl. Physiol.* **100**, 390-398.
- Bruinzeel, L. W., Piersma, T. and Kersten, M. (1999). Low costs of terrestrial locomotion in waders. *Ardea* **87**, 199-205.
- Cavagna, G. A., Heglund, N. C. and Taylor, C. R. (1977). Mechanical work in terrestrial locomotion - two basic mechanisms for minimizing energy-expenditure. *Am. J. Physiol.* **233**, R243-R261.
- Dawson, T. J. and Taylor, C. R. (1973). Energetic cost of locomotion in kangaroos. *Nature* **246**, 313-314.
- Day, L. M. and Jayne, B. C. (2007). Interspecific scaling of the morphology and posture of the limbs during the locomotion of cats (Felidae). *J. Exp. Biol.* **210**, 642-654.
- Ellerby, D. J. and Marsh, R. L. (2006). The energetic costs of trunk and distal-limb loading during walking and running in guinea fowl *Numida meleagris*: II. Muscle energy use as indicated by blood flow. *J. Exp. Biol.* **209**, 2064-2075.
- Fedak, M. A., Pinshow, B. and Schmidt, K. (1974). Energy cost of bipedal running. *Am. J. Physiol.* **227**, 1038-1044.
- Fedak, M. A., Rome, L. and Seeherman, H. J. (1981). One-step N<sub>2</sub>-dilution technique for calibrating open-circuit VO<sub>2</sub> measuring systems. *J. Appl. Physiol.* **51**, 772-776.
- Fedak, M. A., Heglund, N. C. and Taylor, C. R. (1982). Energetics and mechanics of terrestrial locomotion. II. Kinetic energy changes of the limbs and body as a function of speed and body size in birds and mammals. *J. Exp. Biol.* **97**, 23-40.
- Fish, F. E., Frappell, P. B., Baudinette, R. V. and MacFarlane, P. M. (2000). Energetics of terrestrial locomotion of the platypus: metabolic inefficiencies due to aquatic adaptation. *Am. Zool.* **40**, 1015-1016.
- Fish, F. E., Frappell, P. B., Baudinette, R. V. and MacFarlane, P. M. (2001). Energetics of terrestrial locomotion of the platypus *Ornithorhynchus anatinus*. *J. Exp. Biol.* **204**, 797-803.
- Full, R. J. and Tu, M. S. (1991). Mechanics of a rapid running insect: two-, four- and six-legged locomotion. *J. Exp. Biol.* **156**, 215-231.
- Full, R. J., Zuccarello, D. A. and Tullis, A. (1990). Effect of variation in form on the cost of terrestrial locomotion. *J. Exp. Biol.* **150**, 233-246.
- Garland, T. (1983). The relation between maximal running speed and body mass in terrestrial mammals. *J. Zool.* **199**, 157-170.
- Gatesy, S. M. and Biewener, A. A. (1991). Bipedal locomotion: effects of speed, size and limb posture in birds and humans. *J. Zool.* **224**, 127-147.
- Griffin, T. M. and Kram, R. (2000). Biomechanics: penguin waddling is not wasteful. *Nature* **408**, 929.
- Griffin, T. M., Kram, R., Wickler, S. J. and Hoyt, D. F. (2004). Biomechanical and energetic determinants of the walk-trot transition in horses. *J. Exp. Biol.* **207**, 4215-4223.
- Halsey, L. G. and White, C. R. (2012). Comparative energetics of mammalian locomotion: humans are not different. *J. Hum. Evol.* **63**, 718-722.
- Heglund, N. C. and Taylor, C. R. (1988). Speed, stride frequency and energy-cost per stride - how do they change with body size and gait. *J. Exp. Biol.* **138**, 301-318.
- Heglund, N. C., Cavagna, G. A. and Taylor, C. R. (1982a). Energetics and mechanics of terrestrial locomotion .3. Energy changes of the center of mass as a function of speed and body size in birds and mammals. *J. Exp. Biol.* **97**, 41-56.
- Heglund, N. C., Fedak, M. A., Taylor, C. R. and Cavagna, G. A. (1982b). Energetics and mechanics of terrestrial locomotion .4. Total mechanical energy changes as a function of speed and body size in birds and mammals. *J. Exp. Biol.* **97**, 57-66.
- Janis, C. M. and Wilhelm, P. B. (1993). Were there mammalian pursuit predators in the Tertiary? Dances with wolf avatars. *J. Mamm. Evol.* **1**, 103-125.
- Kram, R. and Taylor, C. R. (1990). Energetics of running: a new perspective. *Nature* **346**, 265-267.
- Langman, V. A., Roberts, T. J., Black, J., Maloij, G. M. O., Heglund, N. C., Webers, J. M., Kram, R. and Taylor, C. R. (1995). Moving cheaply - energetics of walking in the African elephant. *J. Exp. Biol.* **198**, 629-632.
- Langman, V. A., Rowe, M. F., Roberts, T. J., Langman, N. V. and Taylor, C. R. (2012). Minimum cost of transport in Asian elephants: do we really need a bigger elephant? *J. Exp. Biol.* **215**, 1509-1514.
- Lighton, J. R. B. (2008). *Measuring Metabolic Rates: A Manual For Scientists*. Oxford: Oxford University Press.
- Maloij, G. M. O., Rugangazi, B. M. and Rowe, M. F. (2009). Energy expenditure during level locomotion in large desert ungulates: the one-humped camel and the domestic donkey. *J. Zool.* **277**, 248-255.
- Margaria, R., Sassi, G., Aghemo, P. and Cerretelli, P. (1963). Energy cost of running. *J. Appl. Physiol.* **18**, 367-370.
- Minetti, A. E., Ardigo, L. P., Reinach, E. and Saibene, F. (1999). The relationship between mechanical work and energy expenditure of locomotion in horses. *J. Exp. Biol.* **202**, 2329-2338.
- Nudds, R. L., Codd, J. R. and Sellers, W. I. (2009). Evidence for a mass dependent step-change in the scaling of efficiency in terrestrial Locomotion. *PLoS ONE* **4**, e6927.
- Nudds, R. L., Gardiner, J. D., Tickle, P. G. and Codd, J. R. (2010). Energetics and kinematics of walking in the barnacle goose (*Branta leucopsis*). *Comp. Biochem. Physiol. A Mol. Integr. Physiol.* **156**, 318-324.
- Nudds, R. L., Folkow, L. P., Lees, J. J., Tickle, P. G., Stokkan, K.-A. and Codd, J. R. (2011). Evidence for energy savings from aerial running in the Svalbard rock ptarmigan (*Lagopus muta hyperborea*). *Proc. R. Soc. B Biol. Sci.* **278**, 2654-2661.
- Pontzer, H. (2005). A new model predicting locomotor cost from limb length via force production. *J. Exp. Biol.* **208**, 1513-1524.
- Pontzer, H. (2007a). Effective limb length and the scaling of locomotor cost in terrestrial animals. *J. Exp. Biol.* **210**, 1752-1761.
- Pontzer, H. (2007b). Predicting the energy cost of terrestrial locomotion: a test of the LiMb model in humans and quadrupeds. *J. Exp. Biol.* **210**, 484-494.
- Reilly, S. M., McElroy, E. J. and Biknevicius, A. R. (2007). Posture, gait and the ecological relevance of locomotor costs and energy-saving mechanisms in tetrapods. *Zoology* **110**, 271-289.
- Roberts, T. J., Kram, R., Weyand, P. G. and Taylor, C. R. (1998). Energetics of bipedal running I. Metabolic cost of generating force. *J. Exp. Biol.* **201**, 2745-2751.
- Rubenson, J., Heliam, D. B., Lloyd, D. G. and Fournier, P. A. (2004). Gait selection in the ostrich: mechanical and metabolic characteristics of walking and running with and without an aerial phase. *Proc. R. Soc. B Biol. Sci.* **271**, 1091-1099.
- Rubenson, J., Heliam, D. B., Maloney, S. K., Withers, P. C., Lloyd, D. G. and Fournier, P. A. (2007). Reappraisal of the comparative cost of human locomotion using gait-specific allometric analyses. *J. Exp. Biol.* **210**, 3513-3524.
- Schmidt-Nielsen, K. (1975). Scaling in biology: the consequences of size. *J. Exp. Zool.* **194**, 287-307.
- Schmidt-Nielsen, K. (1984). *Scaling, Why is Animal Size So Important?* Cambridge; New York: Cambridge University Press.
- Studel, K. and Beattie, J. (1995). Does limb length predict the relative energetic cost of locomotion in mammals? *J. Zool.* **235**, 501-514.
- Taylor, C. R., Schmidt, K. and Raab, J. L. (1970). Scaling of energetic cost of running to body size in mammals. *Am. J. Physiol.* **219**, 1104-1107.
- Taylor, C. R., Heglund, N. C., McMahon, T. A. and Looney, T. R. (1980). Energetic cost of generating muscular force during running - a comparison of large and small animals. *J. Exp. Biol.* **86**, 9-18.
- Taylor, C. R., Heglund, N. C. and Maloij, G. M. O. (1982). Energetics and mechanics of terrestrial Locomotion .1. Metabolic energy-consumption as a function of speed and body size in birds and mammals. *J. Exp. Biol.* **97**, 1-21.
- Tickle, P. G., Richardson, M. F. and Codd, J. R. (2010). Load carrying during locomotion in the barnacle goose (*Branta leucopsis*): the effect of load placement and size. *Comp. Biochem. Physiol. A Mol. Integr. Physiol.* **156**, 309-317.
- Tickle, P. G., Lean, S. C., Rose, K. A. R., Wadugodapitiya, A. P. and Codd, J. R. (2013). The influence of load carrying on the energetics and kinematics of terrestrial locomotion in a diving bird. *Biol. Open* **2**, 1239-1244.
- Tullis, A. and Andrus, S. C. (2011). The cost of incline locomotion in ghost crabs (*Ocypode quadrata*) of different sizes. *J. Comp. Physiol. B* **181**, 873-881.
- Watson, R. R., Rubenson, J., Coder, L., Hoyt, D. F., Propert, M. W. G. and Marsh, R. L. (2011). Gait-specific energetics contributes to economical walking and running in emus and ostriches. *Proc. R. Soc. B Biol. Sci.* **278**, 2040-2046.
- Weyand, P. G., Smith, B. R., Puyau, M. R. and Butte, N. F. (2010). The mass-specific energy cost of human walking is set by stature. *J. Exp. Biol.* **213**, 3972-3979.
- Yousef, M. K., Freeland, D. V. and Dill, D. B. (1972). Energetic cost of grade walking in man and burro, *Equus-asinus* - desert and mountain. *J. Appl. Physiol.* **33**, 337-340.
- Yousef, M. K., Webster, M. E. D. and Yousef, O. M. (1989). Energy costs of walking in camels, *Camelus dromedarius*. *Physiol. Zool.* **62**, 1080-1088.
- Zani, P. A. and Kram, R. (2008). Low metabolic cost of locomotion in ornate box turtles, *Terrapene ornata*. *J. Exp. Biol.* **211**, 3671-3676.
